# Supplementary material for: Multiplexing Iduronate-2-Sulphatase (MPS-II) into a 7-Plex Lysosomal Storage Disorder MS/MS Assay Using Cold-Induced Phase Separation
Source: MDPI journal article supplement (doi:10.3390/ijns9020032), 2023-06-08
Supplement: s1 [file s1]

# Multiplexing Iduronate-2-Sulphatase (MPS-II) into a 7-Plex Lysosomal Storage Disorder MS/MS Assay Using Cold-Induced Phase Separation

Elya Courtney <sup>1</sup>, C. Austin Pickens, Carla Cuthbert, and Konstantinos Petritis\*

<sup>1</sup> Centers for Disease Control and Prevention; ECourtney2@cdc.gov

\* Correspondence: K. Petritis, kpetritis@cdc.gov

## Supplementary Material

| Product                          | Vendor            | Location            | Product Number                   |
|----------------------------------|-------------------|---------------------|----------------------------------|
| 6-Plex S&IS                      | PerkinElmer®      | Hopkinton, MA, USA  | CCM05458Y000EA<br>Lot#: 20210902 |
| I2S S&IS                         | PerkinElmer®      | Hopkinton, MA, USA  | 4400-0010<br>Lot#: 20210802      |
| 96-well plate                    | VWR               | Radnor, PA, USA     | 9444-104                         |
| LiChrosolv® EtOAc                | VWR               | Radnor, PA, USA     | 1.03649.1000                     |
| Optima LC/MS Water               | Fisher            | Waltham, MA, USA    | W6-4                             |
| Optima LC/MS Acetonitrile        | Fisher            | Waltham, MA, USA    | A955-4                           |
| Optima LC/MS Methanol            | Fisher            | Waltham, MA, USA    | A456-4                           |
| Foil Seals                       | Biosero           | San Diego, CA, USA  | STA3100006                       |
| LC/MS Formic Acid                | Thermo Scientific | Waltham, MA, USA    | 85178                            |
| XSelect CSH UPLC Column          | Waters™           | Milford, MA, USA    | 186005296                        |
| XSelect CSH Guard Column         | Waters™           | Milford, MA, USA    | 186005303                        |
| TargetLynx                       | Waters™           | Milford, MA, USA    | Version 4.2                      |
| Skyline - open source            | Seattle Quant     | Seattle, WA, USA    | V 20.1.0.155                     |
| Centrifuge – Tina 380R           | Hettich           | Tuttlingen, Germany | 1706-01                          |
| Incubator Shaker – MaxQ 4450     | Thermo Scientific | Waltham, MA, USA    | No longer sold                   |
| N2 Plate Dryer – SPE Dry 96 Dual | Biotage®          | Charlotte, NC, USA  | SD2-9600-DHS-NA                  |

Supplement Table S1: List of products with vendor information and product numbers for relevant chemicals, materials, equipment, and software.
